# Supplementary material for: Mutations associated with human neural tube defects display disrupted planar cell polarity in Drosophila
Source: eLife. 2020 Apr 1;9:e53532. doi: 10.7554/eLife.53532 (PMC7180057; doi:10.7554/eLife.53532)
Supplement: Figure 2—source data 1. [file elife-53532-fig2-data1.xlsx]

## Sheet: Sheet1
Region 1 - Raw data	Vang-/-	w1118	Wild-type	D317E	R321L	R332H	V391T	K418C	K577H
0-30 degrees	0	0	3	0	0	18	1	2	0
31-60 degrees	0	0	13	0	0	30	16	13	0
61-90 degrees	1	0	34	1	0	32	31	39	0
91-120 degrees	64	0	27	39	0	8	21	41	6
121-150 degrees	122	59	26	53	22	7	25	9	60
151-180 degrees	1	59	50	18	75	3	38	24	46
181-210 degrees	0	0	35	0	70	8	16	19	5
211-240 degrees	0	0	12	0	0	23	6	3	0
241-270 degrees	0	0	4	0	0	3	1	0	0
271-300 degrees	0	0	0	0	0	4	0	0	0
301-330 degrees	0	0	0	0	0	3	0	0	0
331-360 degrees	0	0	0	0	0	3	2	0	0
Region 2 - Raw data	Vang-/-	w1118	Wild-type	D317E	R321L	R332H	V391T	K418C	K577H
0-30 degrees	17	0	0	0	0	2	0	0	0
31-60 degrees	76	0	0	18	0	0	0	0	0
61-90 degrees	72	0	0	46	0	1	0	0	0
91-120 degrees	106	0	0	109	0	9	6	0	15
121-150 degrees	154	64	154	316	54	79	69	108	370
151-180 degrees	145	385	260	89	355	247	232	167	227
181-210 degrees	98	58	165	3	200	270	279	168	36
211-240 degrees	24	0	9	0	0	43	33	95	0
241-270 degrees	7	0	0	0	0	6	0	0	0
271-300 degrees	6	0	0	0	0	1	0	0	0
301-330 degrees	17	0	0	0	0	0	0	0	0
331-360 degrees	17	0	0	0	0	0	0	0	0
