# Supplementary material for: Mutations associated with human neural tube defects display disrupted planar cell polarity in Drosophila
Source: eLife. 2020 Apr 1;9:e53532. doi: 10.7554/eLife.53532 (PMC7180057; doi:10.7554/eLife.53532)
Supplement: Figure 5—source data 1. [file elife-53532-fig5-data1.xlsx]

## Sheet: Sheet1
ac> (Chirality)	WT	Flip	Sym.
Vang-/-	288	193	45
WT	213	13	0
D317E	192	136	26
R321L	474	12	5
R332H	181	32	5
V391T	727	78	7
K418C	611	52	4
K577H	446	258	64
ac> (Rotation)	Mild	Moderate	Severe
Vang-/-	46	62	69
WT	136	9	1
D317E	73	49	29
R321L	121	13	0
R332H	109	14	0
V391T	102	3	0
K418C	143	0	0
K577H	138	24	9
sep> (Chirality)	WT	Flip	Sym.
Vang-/-	203	137	25
WT	204	108	13
D317E	170	95	47
R321L	124	59	20
R332H	129	93	12
V391T	19	101	6
K418C	240	169	19
K577H	215	97	36
sep> (Rotation)	Mild	Moderate	Severe
Vang-/-	28	37	35
WT	59	12	18
D317E	47	42	23
R321L	47	33	21
R332H	66	48	11
V391T	86	37	4
K418C	86	25	23
K577H	61	34	23
